1 **Noninvasive prenatal test of methylmalonic academia cblC type through targeted**  
2 **sequencing of cell-free DNA in maternal plasma**

3 Lianshu Han<sup>\*</sup>, Chao Chen<sup>†,‡</sup>, Fengyu Guo<sup>†,‡</sup>, Jun Ye<sup>\*</sup>, Zhiyu Peng<sup>§</sup>, Wenjuan Qiu<sup>\*</sup>,  
4 Yaoshen Wang<sup>†</sup>, Wei Li<sup>§</sup>, Huiwen Zhang<sup>\*</sup>, Lili Liang<sup>\*</sup>, Yu Wang<sup>\*</sup>, Huanhuan Wang<sup>\*</sup>,  
5 Xing Ji<sup>\*</sup>, Jun Sun<sup>†,‡</sup>, Xuefan Gu<sup>\*</sup>

6 <sup>\*</sup>Xinhua Hospital, Shanghai Institute for Pediatric Research, Shanghai Jiao Tong  
7 University School of Medicine, Shanghai 200092, China;

8 <sup>†</sup>Tianjin Medical Laboratory, BGI-Tianjin, BGI-Shenzhen, Tianjin 300308, China;

9 <sup>‡</sup>Wuhan BGI Clinical Laboratory Co., Ltd, BGI-Wuhan, BGI-Shenzhen, Wuhan  
10 430074, China;

11 <sup>§</sup>BGI Genomics, BGI-Shenzhen, Shenzhen 518083, China;

12 The first two authors contributed equally to this work.

13 **Runing title:** NIPT of MMA cblC type

14 **Keywords:** methylmalonic academia; *MMACHC*; noninvasive prenatal test; targeted  
15 sequencing; cell-free DNA

16 **Corresponding author:** Xuefan Gu and Jun Sun

17 [guxuefan@xinhuamed.com.cn](mailto:guxuefan@xinhuamed.com.cn): Xinhua Hospital, Shanghai Institute for Pediatric  
18 Research, Shanghai Jiao Tong University School of Medicine.

19 1665Kongjiang Road, Shanghai 200092, China.

20 Phone number: 86-21-25076453

21 [sunjun@genomics.cn](mailto:sunjun@genomics.cn): Tianjin Medical Laboratory, E3 Building, Airport Economics  
22 Zone, Tianjin 300308, China

23 Phone number: +86 02259096488

24 **Abstract:**

25 Methylmalonic acidemia (MMA) cbIC type is the most frequent inborn error of  
26 intracellular cobalamin metabolism which is caused by mutations of *MMACHC* gene.  
27 Non-invasive test of MMA for pregnant women facilitates safe and timely prenatal  
28 diagnosis of the disease. In our study, we aimed to design and validate a  
29 haplotype-based noninvasive prenatal test (NIPT) method for cbIC type of MMA.  
30 Targeted capture sequencing using customized hybridization was performed utilizing  
31 gDNA (genomic DNA) of trios including parents and an affected proband to  
32 determine parental haplotypes associated with the mutant and wild allele. The fetal  
33 haplotype was inferred later based on the high depth sequencing data of maternal  
34 plasma as well as haplotype linkage analysis. The fetal genotypes deduced by NIPT  
35 were further validated by amniocentesis. Haplotype-based NIPT was successfully  
36 performed in 21 families. The results of NIPT of 21 families were all consistent with  
37 invasive prenatal diagnosis, which was interpreted in a blinded fashion. Three fetuses  
38 were identified as compound heterozygosity of *MMACHC*, 9 fetuses were carriers of  
39 *MMACHC* variant, and 9 fetuses were normal. These results indicated that the  
40 haplotype-based NIPT for MMA through small target capture region sequencing is  
41 technically accurate and feasible.

42

## 43 **Introduction**

44 Methylmalonic acidemia (MMA) is caused by a deficiency of methylmalonyl-coA  
45 mutase or coenzyme adenosylcobalamin (AdoCbl). The cblC type combined with  
46 methylmalonic acidemia and homocystinuria is a kind of autosomal recessive  
47 hereditary disease and the incidence was found to be in 1 in 48,000 to 1 in 250,000  
48 worldwide (Carrillo-Carrasco *et al.* 2012; Wang *et al.* 2010). Newborn screening for  
49 MMA in Shandong province of China showed an estimated prevalence of 1 in 3920  
50 during birth (Han *et al.* 2016). The MMA cblC type caused by mutations in the  
51 *MMACHC* gene (NM\_015506.2) located on chromosome 1p34.1 is the most frequent  
52 congenital error in intracellular co-amine metabolism. Prenatal diagnosis of MMA  
53 was essential due to age of onset in neonatal period and serious symptoms such as  
54 multiple system damage and lethal possibility. It can not only contribute to early  
55 medical management of infants, but also allows treatment of affected foetus as soon  
56 as possible to reduce irreversible organ damage associated with metabolic acidosis  
57 and high blood ammonia. (Huemer *et al.* 2005; Trefz *et al.* 2016).

58 Recently, several noninvasive prenatal test (NIPT) methods aimed to avoid  
59 miscarriage or infection risk method have been developed (Evans *et al.* 2002;  
60 Mujezinovic and Alfirevic 2007). Besides large-scale clinical application in fetal  
61 aneuploidies screening, NIPT for dominant single-gene disorders confined to detect  
62 paternally inherited and de novo mutations has also been introduced to clinical trials  
63 (Lo *et al.* 1998; Fan *et al.* 2008). However, NIPT for recessive single gene disorders  
64 are still at laboratory research stage. Our study group has developed a  
65 haplotype-based method of NIPT for recessive inherited single gene diseases using  
66 linkage analysis of trios' members and has been validated in several single gene  
67 disorders (Xu *et al.* 2015; Meng *et al.* 2014; Lam *et al.* 2012; Ma *et al.* 2014; Ye *et al.*

68 2018; Chen *et al.* 2017). The feasibility and accuracy of this method depends on the  
69 informative SNPs used to construct the haplotype and the selection of the targeted  
70 region. NIPT of MMA based on haplotype analysis method has not been reported yet,  
71 and so this study has been designed.

72 In our study, the NIPT of MMA can be accomplished using a 141.39 kb  
73 customized probe, including *MMACHC* and 1125 surrounding highly heterozygous  
74 SNPs ( $0.3 < \text{minor allele frequency} < 0.5$ ) distributed within the 1 Mb on chromosome  
75 1 (Figure 1). Our study indicated that the haplotype-based NIPT for MMA through  
76 small target capture region sequencing is technically accurate and feasible, and also  
77 further highlighted the feasibility of NIPT of monogenic diseases.

78

## 79 **Materials and Methods**

### 80 **Patient recruitment**

81 Twenty-one at-risk families including singleton pregnant woman, her husband, and  
82 proband diagnosed with MMA were enrolled at Shanghai Xin Hua Hospital with  
83 genetic counseling and informed consent. The institutional review board (IRB) of BGI  
84 and Shanghai Xinhua Hospital approved our study with approval number BGI-IRB  
85 NO. FT15195 and XHEC-C-2015-025.

86 Ten causative mutations in four exons of *MMACHC* gene in probands and their  
87 parents were already identified prior to performing NIPT of MMA during pregnancy.  
88 Before amniocentesis, blood samples were drawn from each pregnant woman at  
89 16–20 weeks of gestation and her family members was used for NIPT of MMA. The  
90 maternal plasma should be separated as soon as possible. Amniotic fluid (AF) samples  
91 for routine prenatal diagnosis were obtained at 16–18 weeks of gestation. The data  
92 analysis of fetal DNA sample was blinded to NIPT. The AF samples of F01- F06

93 family were also sent to BGI to evaluate the accuracy of inferred paternal and  
94 maternal specific loci of fetus compared with the AF standard haplotype.

### 95 **Targeted sequencing**

96 The extraction of gDNA and maternal plasma DNA was accomplished using the  
97 commercial kits from QIAGEN. The NGS library of gDNA was constructed according  
98 to the Illumina standard protocol. The construction of cell-free DNA library as a result  
99 of its micro inputs nature was performed by the Kapa Biosystem library preparation  
100 kit. The hybrid captures of gDNA and cf-DNA libraries were separately carried out  
101 using the same probe. The post-capture libraries were sequenced using PE 101 bp on  
102 Illumina platform (Hiseq 2500).

### 103 **Variation calling**

104 The raw data were aligned to the human reference sequence (Hg19, GRCh37) by  
105 BWA software (0.7.12) in the paired end mode. After removal of low-quality reads  
106 including duplicated reads and multiple aligned reads using Picard Tools, Variation  
107 calling was accomplished through GATK software. Only the variations with depth  
108 greater than 50x will be analyzed in the next step.

### 109 **Estimation of fetal concentration and plasma sequencing error**

110 The fetal genotype should be heterozygous state with different homozygous  
111 genotype of parents according to the Mendel's laws. So, it could be estimated as two  
112 times of the percentage of the minor allele depth to the total depth of this allele. The  
113 sequencing error could be described as the ratio of the count of different loci reads to  
114 total count of this SNP reads when the genotypes of parents are same homozygous.

### 115 **NIPT for MMA**

116 Haplotypes linked with wild and mute allele were constructed using SNP  
117 information within flanking and coding region of *MMACHC* gene (You et al. 2014).

118 Hap 0 was defined as the pathogenic haplotype and Hap1 was defined as the  
119 wild-type haplotype. The fetal inheritance from father was determined using the set of  
120 SNPs that were heterozygous in father but homozygous in mother. SNPs that were  
121 heterozygous in mother but homozygous in father were used to determine fetal  
122 inheritance from mother. Hidden Markov Model (HMM) and Viterbi algorithm was  
123 used to deduce the fetal haplotypes using the target region data of plasma (Ma *et al.*  
124 2017).

### 125 **Accuracy of NIPT for MMA**

126 The Sanger sequencing and standard haplotypes of fetal gDNA obtained using  
127 amniotic fluid was further operated to validate the uniformity of NIPT result.

128

## 129 **Results**

### 130 **Sequencing data of recruited families**

131 Sanger sequencing of *MMACHC* was operated to determine the variation of  
132 pathogenic mutation (Table 1). The mean depth of gDNA and cf-DNA was about  
133 147.48x (63.41x–348.05x) and 237.97x (89.67x–396.23x), respectively. The coverage  
134 with more than 20x was approximately 98.14% (90.09–99.68%). The mean capture  
135 efficiency and duplicate rate was 50.19% (27.12%–75.23%) and 7.37%  
136 (4.98%–44.09%) in all the samples (Table S1).

### 137 **Estimation of fetal concentration and plasma sequencing error**

138 For these twenty-one pregnant women, the cf-DNA concentrations varied from  
139 4.62% to 18.96% during the second trimester (Table 2), showing significant  
140 differences between the individuals. The mean sequencing error rate of plasma was  
141 0.41% (0.02–1.18%) (Table 2). The data suggested high experimental quality for next  
142 analysis.

### 143 **Construction of Parental haplotype**

144 The parental haplotype was constructed by the genotyping information from a  
145 trio strategy of father, mother and proband. Clean data with more than 20-fold  
146 coverage were about 97.88% and about 1041 SNPs on the target region were detected.

### 147 **Noninvasive prenatal diagnosis of fetal MMA**

148 The number of SNPs identified ranged from 854 to 1211. The number of  
149 informative SNPs which were used to predict the combination of fetal haplotype  
150 inherited from mother and father were 122 (20–323) and 113 (24–290). Parental  
151 haplotypes were successfully constructed in F01 family. 155 SNPs was used to  
152 determine that the fetus inherited wild allele from the father and none SNP supported  
153 that fetus inherited the pathogenic haplotype. 86 SNPs was used to determine that the  
154 fetus inherited wild allele from the mother and none SNP supported that fetus  
155 inherited the pathogenic haplotype. So, the fetus of F01 was normal because of the  
156 F1+M1 haplotype (Table 3 and Figure 2). Based on this strategy, nine fetuses were  
157 diagnosed as carriers, nine fetuses were normal and three fetuses were affected by  
158 cblC type of MMA due to the compound heterozygous mutation of *MMACHC* (Table  
159 3 and Figure 2).

### 160 **Accuracy of NIPT for MMA**

161 The Sanger results of fetal DNA were 100% consistent with NIPT result (Table 2)  
162 and SNPs deduced using NIPT were 100% consistent with standard haplotypes of  
163 fetal gDNA in F01 to F06 (Table S2).

164

### 165 **Discussion**

166 The cumulative incidence of monogenic disease accounted for 7% of birth defects,  
167 while the chromosomal abnormalities accounted for 6% according to the March of

168 Dimes Global Report on Birth Defects 2006. A growing number of birth defects and  
169 diseases can be diagnosed prenatally and treated before birth in some cases. With the  
170 large-scale clinical application of NIPT for fetal aneuploidies based on massively  
171 parallel sequencing approach (Benn *et al.* 2012; Norton *et al.* 2012; Dar *et al.* 2014),  
172 NIPT of monogenic disease remains the next frontier. In the recent years, NIPT of  
173 monogenic disorders has been actively investigated and it has a great clinical  
174 application prospect, providing requisite prognostic data for clinical intervention.  
175 Initially, NIPT of monogenic disorders relied on the detection or exclusion of  
176 paternally inherited mutations or de novo mutations by direct detection method based  
177 on PCR. PCR-based method such as ddPCR (Lun *et al.* 2008), QPCR (Guissart *et al.*  
178 2017), PCR-RED (Chitty *et al.* 2015) and cSMART (Chen *et al.* 2016; Han *et al.* 2017)  
179 have been reported in  $\beta$  thalassemia, cystic fibrosis, thanatophoric dysplasia, Wilson  
180 disease and autosomal recessive nonsyndromic hearing loss, respectively. PCR-based  
181 method involves the advantage of simple operation. However, the design of primer or  
182 probe at the mutation site that is confined only to SNP and indel remains difficult.  
183 NIPT based on PCR cannot be applied to the major mutation type with copy number  
184 variance (CNV). The sensitivity and specificity of PCR-based NIPT is affected by  
185 fetal DNA fraction and quality of sample.

186 Maternally inherited alleles and alleles shared by both parents were detected by  
187 more sophisticated techniques such as haplotype-based strategy called indirect  
188 method. Haplotype-based strategy such as relative haplotype dosage (RHDO) (Lam *et al.*  
189 2012) and proband-assisted haplotype phasing have been successfully reported in  
190 several recessive monogenic diseases. These historical data were retrospectively  
191 analyzed in our study (Table 4). Fifty-seven high risk families who had an affected  
192 child were enrolled in the clinical research to validate the accuracy and feasibility of



193 NIPT. All the NIPT results were consistent with invasive prenatal diagnosis. Overall,  
194 the data obtained from all the 57 families included in the test have shown sensitivity  
195 and specificity rates of 100%, with 0% failure rate. The accuracy of inferred fetal  
196 maternal alleles and paternal alleles using plasma sequencing data were almost 100%  
197 compared with the standard haplotype obtained by the AF data without considering  
198 the recombination point. Other experiments were necessary to determine the precise  
199 positioning of recombination and whether the proband or fetus involve the  
200 recombination. Ye *et al.* (2018) showed that when the plasma sequence depth was  
201 200X, the accuracy of fetal inherited maternal haplotype was above 99% and when  
202 the fetal fraction was between 5% and 10%, the mean number of SNP was about 20 to  
203 reach 99% detection accuracy. Previous data showed that the haplotype-based NIPT  
204 can be applied to genes with highly homologous sequences like CYP21A2 and SMN1,  
205 which is almost impossible to be detected by directly sequencing the pathogenic  
206 mutations.

207 MMA is one of the most common disorders of congenital organic acid metabolism.  
208 Early prenatal treatment may have an impact on the long-term complications  
209 associated with cbIC disease. Prior studies have evaluated the effects of prenatal  
210 HOCbl administration and the results showed a decrease in the maternal metabolites  
211 (Huemmer *et al.* 2005). Although the haplotype-based strategy was successfully  
212 implemented in several autosomal recessive disorders, this has not been applied in  
213 MMA till now. The feasibility and accuracy of this method depends on the  
214 informative SNPs used to construct the haplotype and the selection of the targeted  
215 region, and hence investigation of technical feasibility is necessary for each target  
216 disease. Our study initially demonstrated the feasibility of haplotype-based NIPT for  
217 *MMACHC*. In our study, the fetal genotype of 21 families was successfully

218 determined using haplotype-assisted NIPT. The result of this study was consistent  
219 with the findings of invasive method. Based on these data, the feasibility and accuracy  
220 of NIPT of MMA using haplotype strategy has been demonstrated. The sensitivity  
221 and specificity rates were both 100%, with 0% failure rate. The accuracy of the fetal  
222 alleles inherited from parents deduced by haplotype strategy were almost 100%  
223 compared with the standard haplotype obtained by the AF data in families from F01  
224 to F06 (Table S2). The other family results showed that the haplotype-based NIPT  
225 method allowed 100% concordance with the invasive diagnostic approach.

226 In most of the reported cases, the targeted region is always relatively large, and the  
227 sequencing cost remained exorbitant, hampering the clinical utility of this technology.  
228 In this research, we have demonstrated the feasibility of NIPT of MMA by  
229 sequencing a much smaller region. This method requires trio members of the family  
230 for constructing the parental haplotype linked to the mutation allele. The sensitivity  
231 and specificity of this method have been reported to be 100% validated by the  
232 invasive result, which is the greatest advantage of haplotype-based strategy NIPT. A  
233 fatal flaw of the haplotype-based strategy is that the feasibility is highly depend on the  
234 availability of proband sample.

235 Linked reads method like 10xGenomics to specify the individual haplotype  
236 directly without proband has been recently reported by Dennis Lo in NIPT of  
237 monogenic diseases (Hui *et al.* 2017), but the technology has several limitations. The  
238 most important restrictive factor for clinical application was the detection success  
239 ratio. In this article, 12 of 13cases were successfully detected and the failed cases  
240 were unable to determine the fetal genotype due to insufficient number of informative  
241 SNPs. In our research, we used the coding region and highly heterozygous SNPs with  
242 1M flanking sequence of *MMAHC* gene to construct the haplotype, and the number

243 of informative SNPs were sufficient to build the fetal haplotype based on HMM  
244 model. Another limitation was that the phasing block size using 10x Genomics linked  
245 reads. The block size was affected by the integrity of input DNA and rigorous  
246 experimental operation. The phasing block stridden across the target gene and  
247 sufficient SNPs surrounding this region coexisted to ensure the success rate. In  
248 summary, 10x Genomics linked the reads have solved the problem of not relying on  
249 the precursor, but the success rate, high cost and complex operation restricted its  
250 clinical application. Further study is needed to develop cost-effective and simplified  
251 technology for NIPT of monogenic disease.

252 In conclusion, we demonstrated the feasibility of haplotype-based NIPT of MMA  
253 by sequencing a much smaller region. The sequencing depth of plasma and the  
254 number of informative SNPs were 200x and 20x, respectively. The proposition  
255 couples who have been diagnosed as monogenic carriers and have an affected child,  
256 our method is applicable to assess the repregnant fetal genotype to clinical  
257 intervention. We here provided the evidence that the same approach can be applied to  
258 other autosomal-recessive disorders, and the overall sensitivity and specificity was  
259 100% on 78 patients tested from the previous and our study.

260

## 261 **Acknowledgments**

262 We thank the patient families and physicians for cooperation during this study. This  
263 study was supported by Major Technical Innovation Project of Hubei Province  
264 (2017ACA097).

265

## 266 **Competing financial interests**

267 The authors declare no conflict of interest.

268

269 **Author Contributions**

270 L.H., J.Y., W.Q., H.Z., L.L., and F.G, obtained patient materials; Y.W., H.W., and  
271 X.J. conducted gene analysis in blood or amniotic fluid cell DNA; C.C., J.S. and Z.P.  
272 designed the study and drafted the paper. Y.W., F.G. and W.L analyzed the data,  
273 interpreted the data and wrote a part of the paper.

274 **Data Availability**

275 The authors affirm that all data necessary for confirming the conclusions of the article  
276 are present within the article, figures, and tables. Supplemental materials reported in  
277 this study are also available in the CNGB Nucleotide Sequence Archive (CNSA,  
278 <ftp://ftp.cngb.org/pub/CNSA/CNP0000164/Supplementation/>)

279 .

280 **References**

- 281 1. Carrillo-Carrasco, N., R. J. Chandler and C. P. Venditti, 2012 Combined  
282 methylmalonic acidemia and homocystinuria, cbIC type. I. Clinical presentations,  
283 diagnosis and management. *J Inherit Metab Dis* 35: 91-102.
- 284 2. Wang, F., L. Han, Y. Yang, X. Gu, J. Ye *et al.*, 2010 Clinical, biochemical, and  
285 molecular analysis of combined methylmalonic acidemia and  
286 hyperhomocysteinemia (cbIC type) in China. *J Inherit Metab Dis* 33 Suppl 3:  
287 S435-442.
- 288 3. Han, B., Z. Cao, L. Tian, H. Zou, L. Yang *et al.*, 2016 Clinical presentation, gene  
289 analysis and outcomes in young patients with early-treated combined  
290 methylmalonic acidemia and homocysteinemia (cbIC type) in Shandong province,  
291 China. *Brain Dev* 38: 491-497.
- 292 4. Evans, M. I., E. L. Krivchenia, R. J. Wapner and R. Depp, 3rd, 2002 Principles of  
293 screening. *Clin Obstet Gynecol* 45: 657-660; discussion 730-652.
- 294 5. Mujezinovic, F., and Z. Alfirevic, 2007 Procedure-related complications of  
295 amniocentesis and chorionic villous sampling: a systematic review. *Obstet*  
296 *Gynecol* 110: 687-694.
- 297 6. Lo, Y. M., M. S. Tein, T. K. Lau, C. J. Haines, T. N. Leung *et al.*, 1998  
298 Quantitative analysis of fetal DNA in maternal plasma and serum: implications  
299 for noninvasive prenatal diagnosis. *Am J Hum Genet* 62: 768-775.
- 300 7. Fan, H. C., Y. J. Blumenfeld, U. Chitkara, L. Hudgins and S. R. Quake, 2008  
301 Noninvasive diagnosis of fetal aneuploidy by shotgun sequencing DNA from  
302 maternal blood. *Proc Natl Acad Sci U S A* 105: 16266-16271.
- 303 8. Xu, Y., X. Li, H. J. Ge, B. Xiao, Y. Y. Zhang *et al.*, 2015 Haplotype-based  
304 approach for noninvasive prenatal tests of Duchenne muscular dystrophy using

- 305 cell-free fetal DNA in maternal plasma. *Genet Med* 17: 889-896.
- 306 9. Meng, M., X. Li, H. Ge, F. Chen, M. Han *et al.*, 2014 Noninvasive prenatal  
307 testing for autosomal recessive conditions by maternal plasma sequencing in a  
308 case of congenital deafness. *Genet Med* 16: 972-976.
- 309 10. Lam, K. W., P. Jiang, G. J. Liao, K. C. Chan, T. Y. Leung *et al.*, 2012 Noninvasive  
310 prenatal diagnosis of monogenic diseases by targeted massively parallel  
311 sequencing of maternal plasma: application to beta-thalassemia. *Clin Chem* 58:  
312 1467-1475.
- 313 11. Ma, D., H. Ge, X. Li, T. Jiang, F. Chen *et al.*, 2014 Haplotype-based approach for  
314 noninvasive prenatal diagnosis of congenital adrenal hyperplasia by maternal  
315 plasma DNA sequencing. *Gene* 544: 252-258.
- 316 12. Ye, J., C. Chen, Y. Yuan, L. Han, Y. Wang *et al.*, 2018 Haplotype-based  
317 Noninvasive Prenatal Diagnosis of Hyperphenylalaninemia through Targeted  
318 Sequencing of Maternal Plasma. *Sci Rep* 8: 161.
- 319 13. You, Y., Y. Sun, X. Li, Y. Li, X. Wei *et al.*, 2014 Integration of targeted  
320 sequencing and NIPT into clinical practice in a Chinese family with maple syrup  
321 urine disease. *Genet Med* 16: 594-600.
- 322 14. Chen, M., S. Lu, Z. F. Lai, C. Chen, K. Luo *et al.*, 2017 Targeted sequencing of  
323 maternal plasma for haplotype-based non-invasive prenatal testing of spinal  
324 muscular atrophy. *Ultrasound Obstet Gynecol* 49: 799-802.
- 325 15. Ma, D., Y. Yuan, C. Luo, Y. Wang, T. Jiang *et al.*, 2017 Noninvasive prenatal  
326 diagnosis of 21-Hydroxylase deficiency using target capture sequencing of  
327 maternal plasma DNA. *Sci Rep* 7: 7427.
- 328 16. Benn, P., H. Cuckle and E. Pergament, 2012 Genome-wide fetal aneuploidy  
329 detection by maternal plasma DNA sequencing. *Obstet Gynecol* 119: 1270;

- 330 author reply 1270-1271.
- 331 17. Norton, M. E., H. Brar, J. Weiss, A. Karimi, L. C. Laurent *et al.*, 2012  
332 Non-Invasive Chromosomal Evaluation (NICE) Study: results of a multicenter  
333 prospective cohort study for detection of fetal trisomy 21 and trisomy 18. *Am J*  
334 *Obstet Gynecol* 207: 137 e131-138.
- 335 18. Dar, P., K. J. Curnow, S. J. Gross, M. P. Hall, M. Stosic *et al.*, 2014 Clinical  
336 experience and follow-up with large scale single-nucleotide polymorphism-based  
337 noninvasive prenatal aneuploidy testing. *Am J Obstet Gynecol* 211 : 527 e521-527  
338 e517.
- 339 19. Lun, F. M., N. B. Tsui, K. C. Chan, T. Y. Leung, T. K. Lau *et al.*, 2008  
340 Noninvasive prenatal diagnosis of monogenic diseases by digital size selection  
341 and relative mutation dosage on DNA in maternal plasma. *Proc Natl Acad Sci U*  
342 *S A* 105: 19920-19925.
- 343 20. Guissart, C., C. Dubucs, C. Raynal, A. Girardet, F. Tran Mau Them *et al.*, 2017  
344 Non-invasive prenatal diagnosis (NIPD) of cystic fibrosis: an optimized protocol  
345 using MEMO fluorescent PCR to detect the p.Phe508del mutation. *J Cyst Fibros*  
346 16: 198-206.
- 347 21. Chitty, L. S., S. Mason, A. N. Barrett, F. McKay, N. Lench *et al.*, 2015  
348 Non-invasive prenatal diagnosis of achondroplasia and thanatophoric dysplasia:  
349 next-generation sequencing allows for a safer, more accurate, and comprehensive  
350 approach. *Prenat Diagn* 35: 656-662.
- 351 22. Chen, Y., Y. Liu, B. Wang, J. Mao, T. Wang *et al.*, 2016 Development and  
352 validation of a fetal genotyping assay with potential for noninvasive prenatal  
353 diagnosis of hereditary hearing loss. *Prenat Diagn* 36: 1233-1241.
- 354 23. Han, M., Z. Li, W. Wang, S. Huang, Y. Lu *et al.*, 2017 A quantitative cSMART

- 355 assay for noninvasive prenatal screening of autosomal recessive nonsyndromic  
356 hearing loss caused by GJB2 and SLC26A4 mutations. *Genet Med* 19:  
357 1309-1316.
- 358 24. Hui, W. W., P. Jiang, Y. K. Tong, W. S. Lee, Y. K. Cheng *et al.*, 2017 Universal  
359 Haplotype-Based Noninvasive Prenatal Testing for Single Gene Diseases. *Clin*  
360 *Chem* 63: 513-524.
- 361 25. Huemer, M., B. Simma, B. Fowler, T. Suormala, O. A. Bodamer *et al.*, 2005  
362 Prenatal and postnatal treatment in cobalamin C defect. *J Pediatr* 147: 469-472.
- 363 26. Trefz, F. K., D. Scheible, G. Frauendienst-egger, M. Huemer, T. Suomala *et al.*,  
364 2016 Successful intrauterine treatment of a patient with cobalamin C defect. *Mol*  
365 *Genet Metab Rep* 6: 55-59.
- 366
- 367



368 **Figures Legends**

369 **Figure 1 Target region of *MMACHC* gene and SNPs used for haplotyping.**

370 Custom NimbleGen probes within the 141.39 kb region was designed including the  
371 *MMACHC* gene coding region and 1125 surrounding highly heterozygous SNPs  
372 distributed within 1 Mb region.

373 **Figure 2 Fetal Haplotype Prediction.**

374 X-axis represents the locus on target region; Y-axis represents the logarithm of the  
375 ratios of different fetal haplotype combinations. The black lines above zero (cyan  
376 lines) indicate that the fetus inherited the pathogenic haplotype (Hap0), and the black  
377 lines below zero indicate that the fetus inherited the normal haplotype (Hap1). Two  
378 purple vertical lines represent the region of the *MMACHC* gene. Left chart and right  
379 chart represents the results of fetal-inherited paternal haplotype and maternal  
380 haplotype, respectively.

**Table 1. Molecular Diagnosis Results in 21 Families.**

| Family | Gene  | Mutation Type     |                                |                           | GW <sup>b</sup> |
|--------|-------|-------------------|--------------------------------|---------------------------|-----------------|
|        |       | Father            | Mother                         | Proband                   |                 |
| F01    | MMACH | c.609G>A/N        | c.658_660delAAG/N <sup>a</sup> | c.609G>A/c.658_660delAAG  | 17              |
| F02    | MMACH | c.609G>A/N        | c.567dupT/N                    | c.567dupT/c.609G>A        | 18              |
| F03    | MMACH | c.441TG[2]/N      | c.609G>A/N                     | c.609G>A/c.441TG[2]       | 17              |
| F04    | MMACH | c.609G>A/N        | c.80A>G/N                      | c.80A>G/c.609G>A          | 17              |
| F05    | MMACH | c.441TG[2]/N      | c.609G>A/N                     | c.441TG[2]/c.609G>A       | 17              |
| F06    | MMACH | c.609G>A/N        | c.80A>G/N                      | c.80A>G/c.609G>A          | 18              |
| F07    | MMACH | c.609G>A/N        | c.609G>A/N                     | c.609G>A/ c.609G>A        | 18              |
| F08    | MMACH | c.609G>A/N        | c.217C>T/N                     | c.217C>T/c.609G>A         | 17              |
| F09    | MMACH | c.609G>A/N        | c.315 C>G/N                    | c.609G>A/c.315 C>G        | 16              |
| F10    | MMACH | c.609G>A/N        | c.609G>A/N                     | c.609G>A/ c.609G>A        | 18              |
| F11    | MMACH | c.658_660delAAG/N | c.609G>A/N                     | c.609G>A/c.658_660delAAG  | 17              |
| F12    | MMACH | c.609G>A/N        | c.609G>A/N                     | c.609G>A/ c.609G>A        | 18              |
| F13    | MMACH | c.609G>A/N        | c.80A>G/N                      | c.609G>A/c.80A>G          | 17              |
| F14    | MMACH | c.658_660delAAG/N | c.609G>A/N                     | c.609G>A/ c.658_660delAAG | 17              |
| F15    | MMACH | c.609G>A/N        | c.609G>A/N                     | c.609G>A/ c.609G>A        | 19              |
| F16    | MMACH | c.609G>A/N        | c.656_658delA GA/N             | c.656_658delA GA/c.609G>A | 18              |
| F17    | MMACH | c.658_660delAAG/N | c.609G>A/N                     | c.609G>A/c.658_660delAAG  | 16              |
| F18    | MMACH | c.445_446delITG/N | c.609G>A/N                     | c.609G>A/c.445_446delITG  | 17              |
| F19    | MMACH | c.394C>T/N        | c.656_658delA GA/N             | c.394C>T/c.656_658delA GA | 17              |
| F20    | MMACH | c.609G>A /N       | c.609G>A /N                    | c.609G>A/ c.609G>A        | 17+5            |
| F21    | MMACH | c.445_446delITG/N | c.482G>A/N                     | c.482G>A/c.445_446delITG  | 17              |

Abbreviations: N<sup>a</sup>, normal; GW<sup>b</sup>, gestational weeks.

**Table 2. Statistics of Error Rate and Fetal DNA Fraction.**

| <b>Pedigree</b> | <b>Type 1 SNP<sup>a</sup></b> | <b>Type 2 SNP<sup>b</sup></b> | <b>Error Rate</b> | <b>Fetal DNA fraction</b> |
|-----------------|-------------------------------|-------------------------------|-------------------|---------------------------|
| O1              | 86                            | 5                             | 0.0200%           | 7.64%                     |
| F02             | 104                           | 463                           | 1.1788%           | 11.45%                    |
| F03             | 79                            | 430                           | 0.1936%           | 16.23%                    |
| F04             | 107                           | 215                           | 0.2437%           | 9.07%                     |
| F05             | 85                            | 14                            | 0.3360%           | 7.66%                     |
| F06             | 99                            | 43                            | 1.0153%           | 18.96%                    |
| F07             | 125                           | 1                             | 0.1631%           | 14.89%                    |
| F08             | 66                            | 421                           | 0.7156%           | 10.93%                    |
| F09             | 80                            | 23                            | 0.0941%           | 4.62%                     |
| F10             | 110                           | 61                            | 0.4655%           | 11.41%                    |
| F11             | 115                           | 4                             | 0.2434%           | 17.84%                    |
| F12             | 82                            | 149                           | 0.3810%           | 6.85%                     |
| F13             | 329                           | 39                            | 0.2170%           | 11.70%                    |
| F14             | 64                            | 24                            | 0.4847%           | 9.86%                     |
| F15             | 66                            | 7                             | 0.5687%           | 11.66%                    |
| F16             | 70                            | 165                           | 0.3680%           | 10.77%                    |
| F17             | 71                            | 441                           | 0.2319%           | 13.03%                    |
| F18             | 49                            | 166                           | 0.8472%           | 10.52%                    |
| F19             | 238                           | 141                           | 0.2406%           | 5.90%                     |
| F20             | 66                            | 23                            | 0.3877%           | 5.85%                     |
| F21             | 143                           | 8                             | 0.2170%           | 8.20%                     |

SNPs<sup>a</sup> that were homozygous with the same type of parents but different bases in the plasma, which were used to calculate the sequencing error rate of plasma; SNPs<sup>b</sup> that were homozygous in both parents but different types, which were used to calculate fetal DNA fractions.

| Family | Gene   | SNPs For F0 <sup>a</sup> | SNPs For F1 <sup>a</sup> | SNPs For M0 <sup>a</sup> | SNPs For M1 <sup>a</sup> | Fetal Haplotype | Fetal Genotype           | NIPT Results | Invasive Test Results    | Consistency <sup>b</sup> |
|--------|--------|--------------------------|--------------------------|--------------------------|--------------------------|-----------------|--------------------------|--------------|--------------------------|--------------------------|
| F01    | MMACHC | 0                        | 155                      | 0                        | 86                       | F1+M1           | N                        | Normal       | N                        | Y <sup>c</sup>           |
| F02    | MMACHC | 37                       | 0                        | 0                        | 86                       | F0+M1           | c.609G>A/N               | Carrier      | c.609G>A/N               | Y                        |
| F03    | MMACHC | 0                        | 60                       | 73                       | 0                        | F1+M0           | c.609G>A/N               | Carrier      | c.609G>A/N               | Y                        |
| F04    | MMACHC | 0                        | 42                       | 94                       | 0                        | F1+M0           | c.80A>G/N                | Carrier      | c.80A>G/N                | Y                        |
| F05    | MMACHC | 109                      | 0                        | 122                      | 0                        | F0+M0           | c.441TG[2]/c.609G>A      | affected     | c.441TG[2]/c.609G>A      | Y                        |
| F06    | MMACHC | 0                        | 325                      | 20                       | 0                        | F1+M0           | c.80A>G/N                | Carrier      | c.80A>G/N                | Y                        |
| F07    | MMACHC | 0                        | 140                      | 0                        | 91                       | F1+M1           | N                        | Normal       | N                        | Y                        |
| F08    | MMACHC | 129                      | 0                        | 42                       | 0                        | F0+M0           | c.217C>T/c.609G>A        | affected     | c.217C>T/c.609G>A        | Y                        |
| F09    | MMACHC | 0                        | 160                      | 77                       | 0                        | F1+M0           | c.315 C>G/N              | Carrier      | c.315 C>G/N              | Y                        |
| F10    | MMACHC | 0                        | 24                       | 0                        | 273                      | F1+M1           | N                        | Normal       | N                        | Y                        |
| F11    | MMACHC | 0                        | 81                       | 0                        | 149                      | F1+M1           | N                        | Normal       | N                        | Y                        |
| F12    | MMACHC | 0                        | 43                       | 203                      | 0                        | F1+M0           | c.609G>A/N               | Carrier      | c.609G>A/N               | Y                        |
| F13    | MMACHC | 0                        | 26                       | 0                        | 117                      | F1+M1           | N                        | Normal       | N                        | Y                        |
| F14    | MMACHC | 220                      | 0                        | 96                       | 0                        | F0+M0           | c.609G>A/c.658-660delAAG | affected     | c.609G>A/c.658-660delAAG | Y                        |
| F15    | MMACHC | 0                        | 27                       | 86                       | 0                        | F1+M0           | c.609G>A/N               | Carrier      | c.609G>A/N               | Y                        |
| F16    | MMACHC | 290                      | 0                        | 0                        | 111                      | F0+M1           | c.609G>A/N               | Carrier      | c.609G>A/N               | Y                        |
| F17    | MMACHC | 0                        | 109                      | 0                        | 84                       | F1+M1           | N                        | Normal       | N                        | Y                        |
| F18    | MMACHC | 0                        | 54                       | 0                        | 323                      | F1+M1           | N                        | Normal       | N                        | Y                        |
| F19    | MMACHC | 108                      | 0                        | 0                        | 128                      | F0+M1           | c.394C>T/N               | Carrier      | c.394C>T/N               | Y                        |
| F20    | MMACHC | 0                        | 27                       | 0                        | 230                      | F1+M1           | N                        | Normal       | N                        | Y                        |
| F21    | MMACHC | 0                        | 274                      | 0                        | 73                       | F1+M1           | N                        | Normal       | N                        | Y                        |

**Table 3. The NIPT Results of 21 Studied Families.**

<sup>a</sup>SNPs for F/M represent the number of SNP supporting the inheritance of fetal haplotype from parents. F0/M0, fetal-inherited mutant haplotype; F1/M1, fetal-inherited normal haplotype; <sup>b</sup>Consistency represents the comparison of NIPT results with invasive testing results; <sup>c</sup> Y, yes; N, normal.

**Table 4. Studies Reporting on NIPT of Monogenic Disease.**

| Author       | Method | Disease              | Case No. | NIPT Results                      | Consistency | Accuracy of maternal alleles | Accuracy of paternal alleles |
|--------------|--------|----------------------|----------|-----------------------------------|-------------|------------------------------|------------------------------|
| Dennis Lo    | RHDO   | $\beta$ -thalassemia | 2        | 2 Carriers                        | Y           | -                            | -                            |
| Dennis Lo    | RHDO   | CAH                  | 14       | 5 Carriers+2 Normal+7 affected    | Y           | -                            | -                            |
| Yanqin You   | PAHP   | MSUD                 | 1        | affected                          | Y           | -                            | -                            |
| Zhengfeng Xu | PAHP   | CAH                  | 1        | Carriers                          | Y           | 96.41%                       | 97.81%                       |
| Meng Meng    | PAHP   | GJB2                 | 1        | Carriers                          | Y           | -                            | -                            |
| Yan Xu       | PAHP   | DMD                  | 8        | 1 Carriers+2 Normal+5 affected    | Y           | 99.98%                       | -                            |
| Min Chen     | PAHP   | SMA                  | 5        | 2 Carriers+2 Normal+1 affected    | Y           | -                            | -                            |
| Zhengfeng Xu | PAHP   | CAH                  | 12       | 6 Carriers+6 affected             | Y           | 100%                         | 100%                         |
| Xuefan Gu    | PAHP   | PKU                  | 13       | 4 Carriers+4 Normal+5 affected    | Y           | 100%                         | 100%                         |
| <b>Total</b> | -      | -                    | 57       | 22 Carriers+10 Normal+25 affected | Y           |                              |                              |

RHDO, relative haplotype dosage; PAHP, proband assisted haplotype phasing; consistency means whether the NIPT result was consistent with the invasive prenatal testing, Y represents yes.

Figure 1

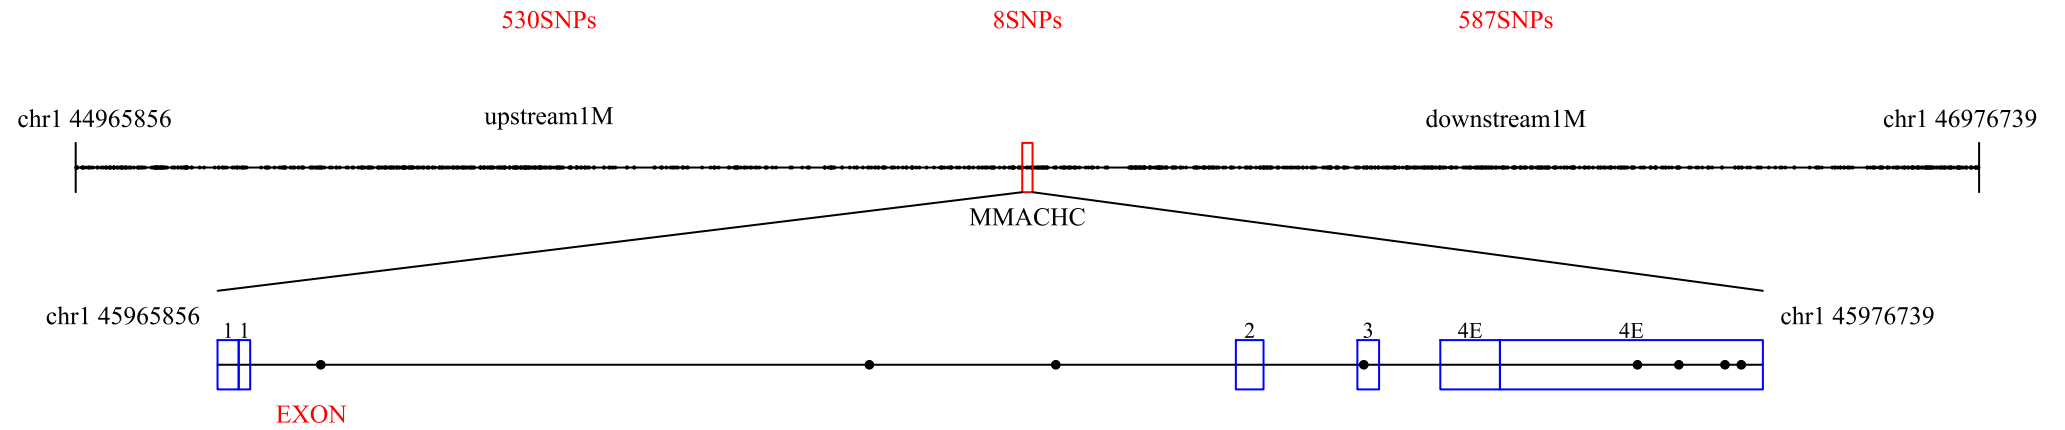

Figure 2

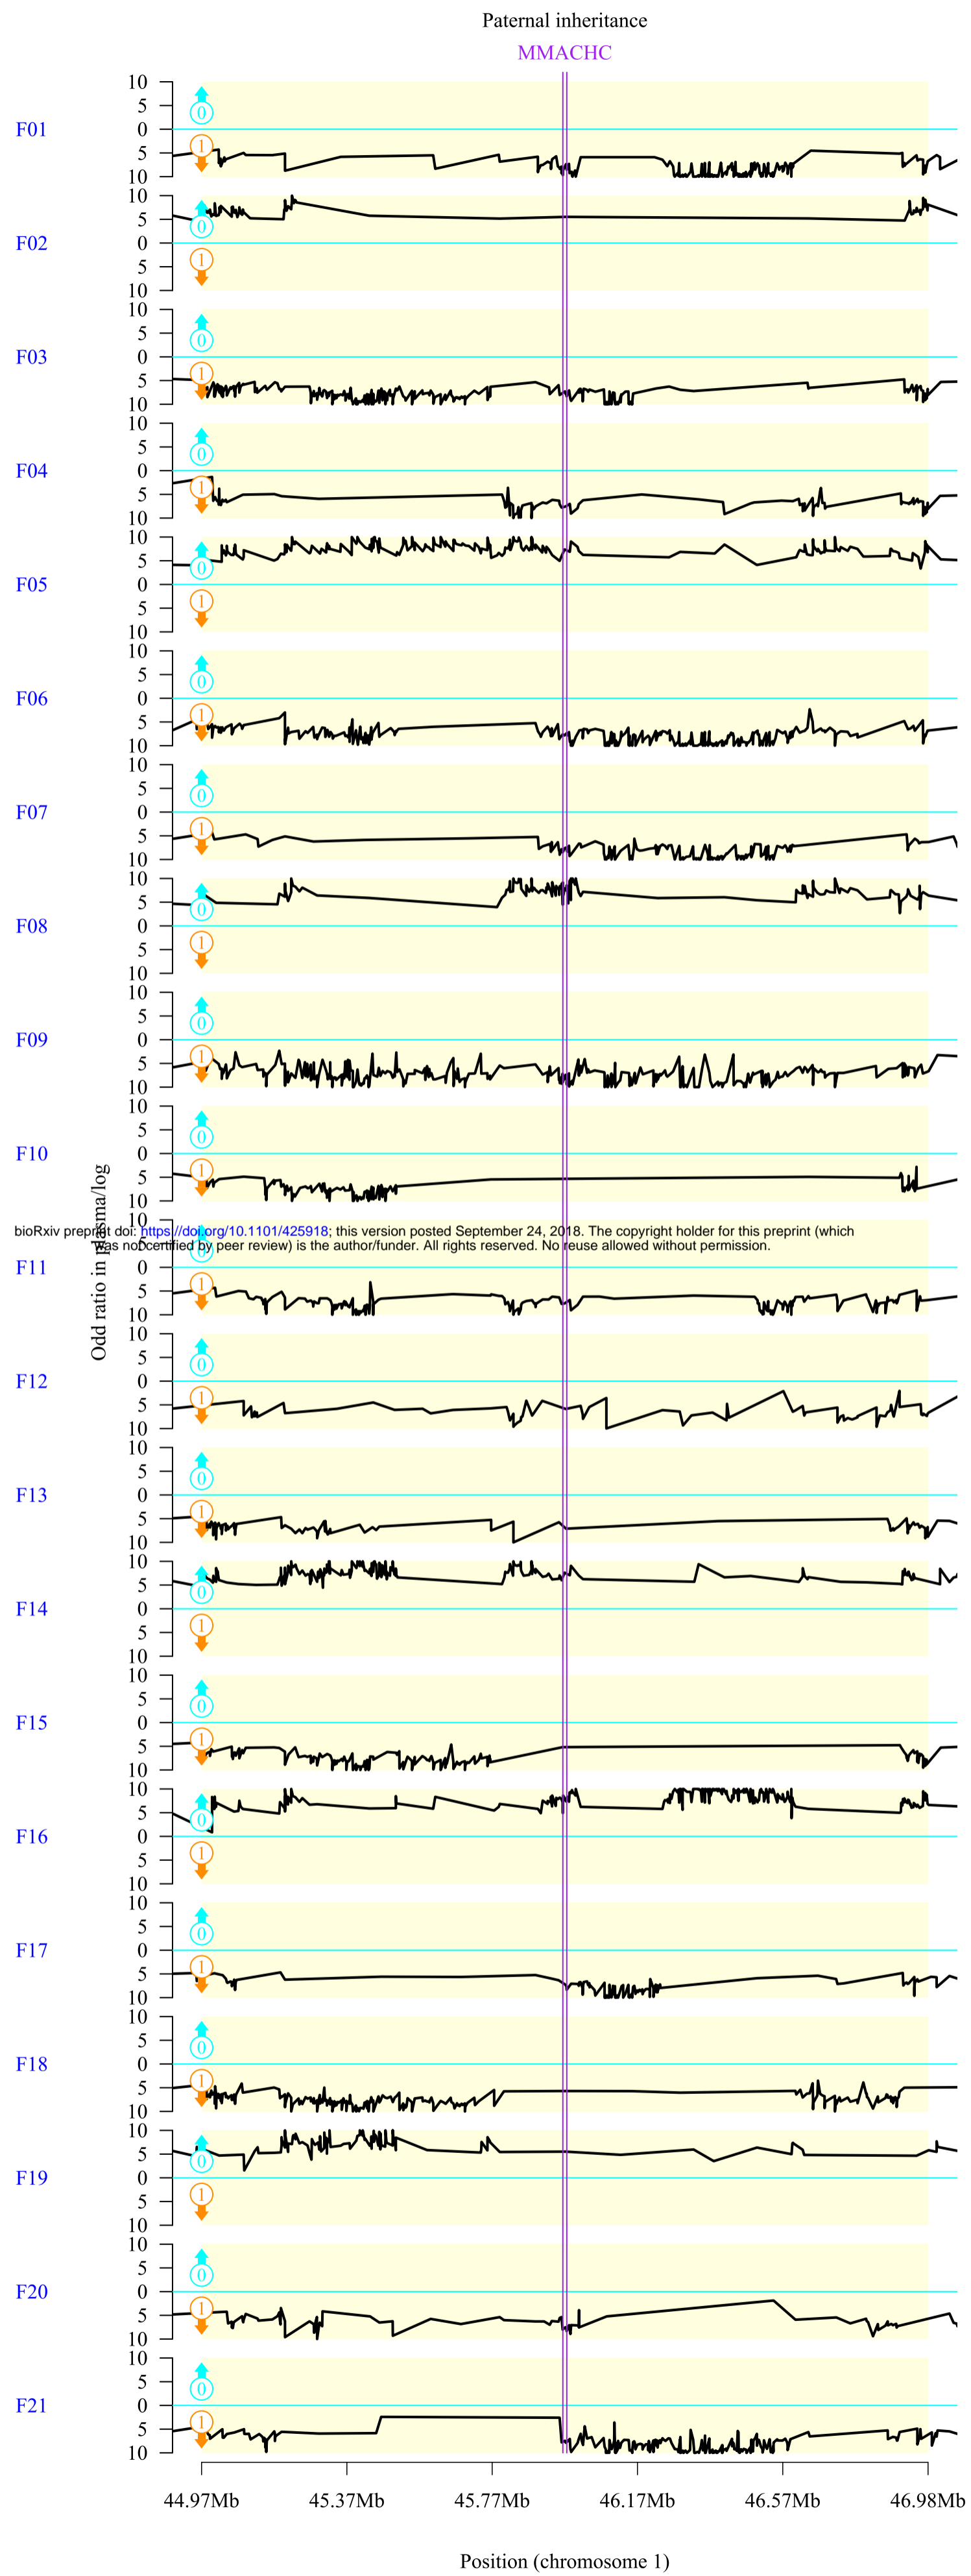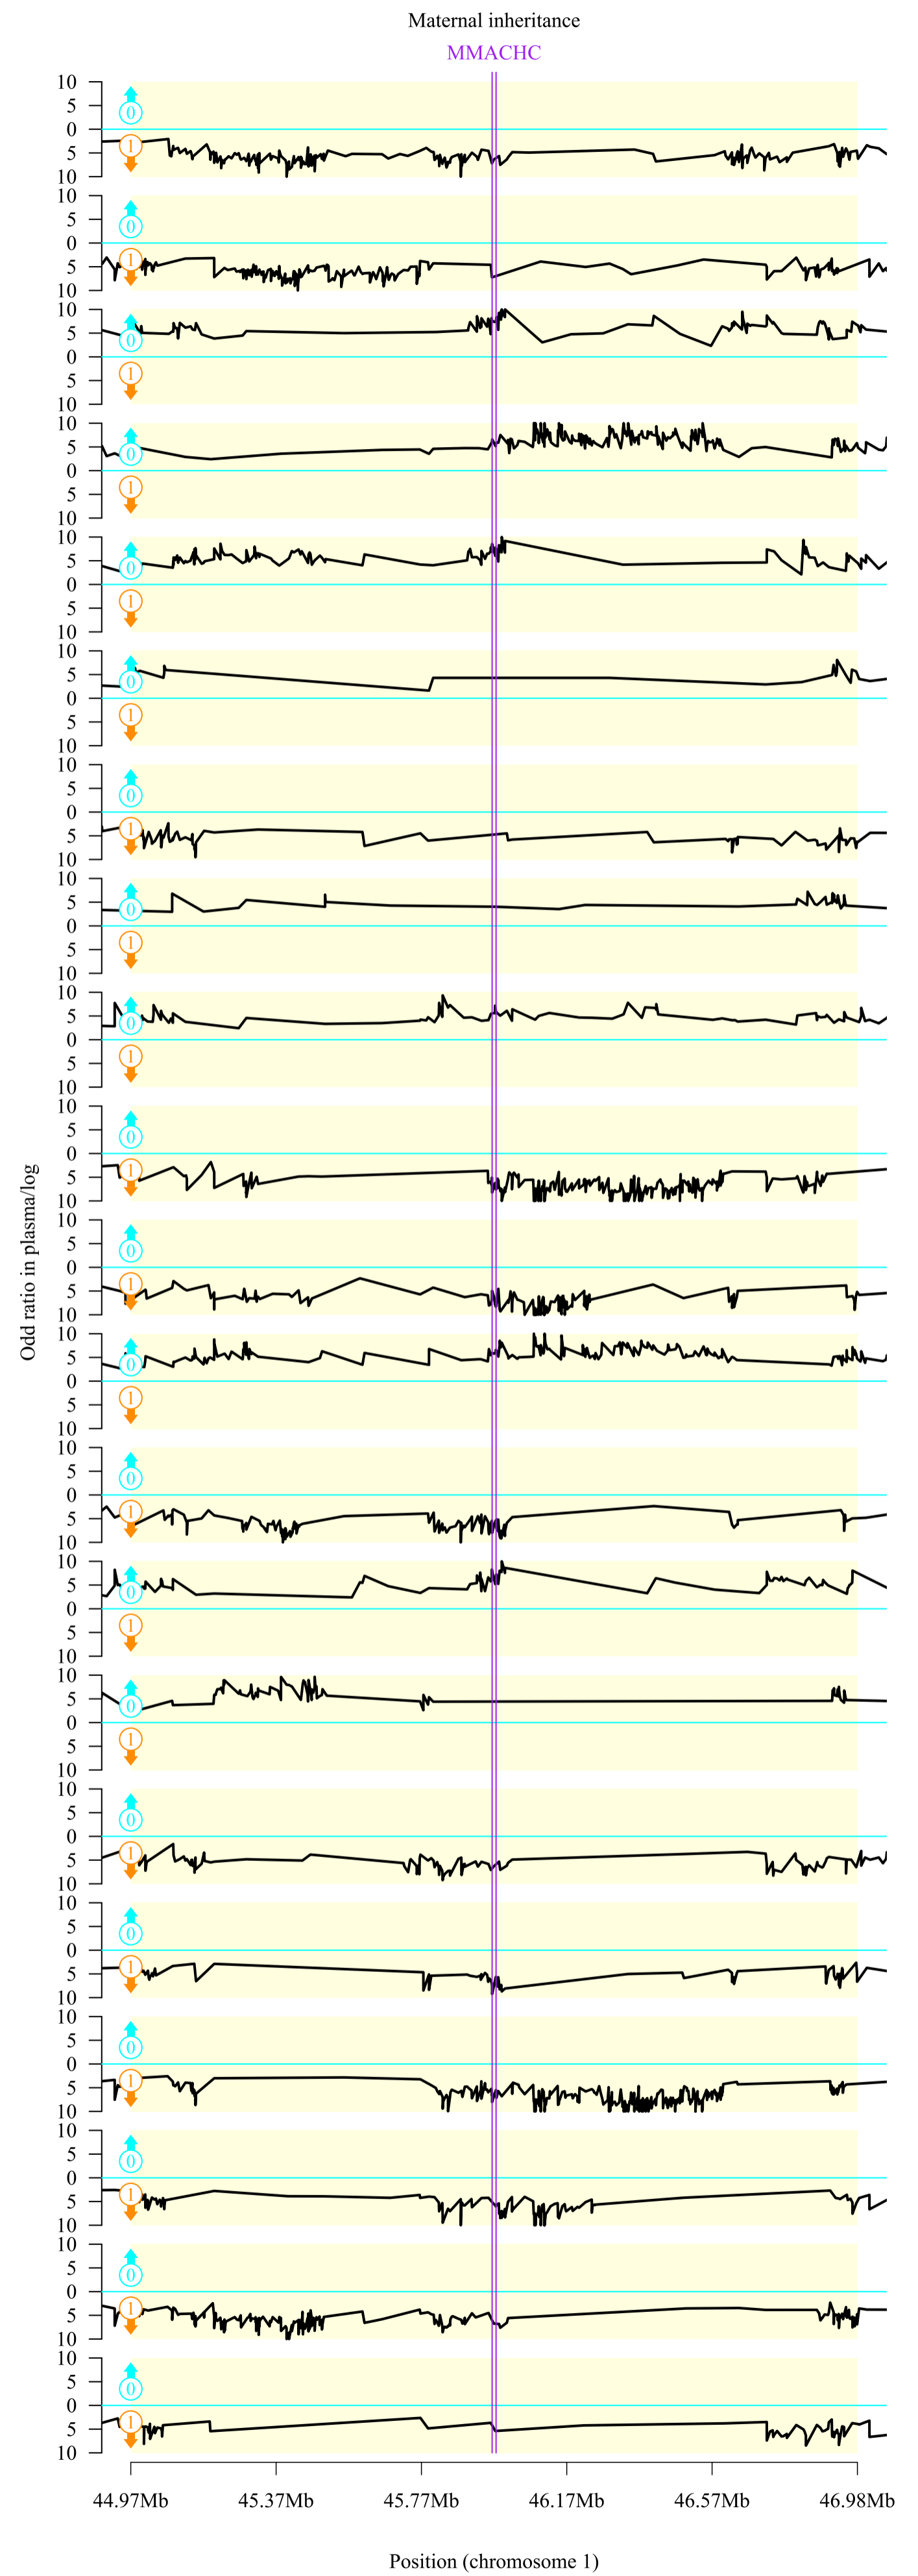

Source: https://www.biorxiv.org/content/10.1101/425918v1.full.pdf
